# Supplementary material for: Fluorescence polarization immunoassay for highly efficient detection of clothianidin in agricultural samples
Source: Royal Society of Chemistry journal article supplement (doi:10.1039/c4ay00987h), 2014-06-12
Supplement: c4ay00987h1.pdf [file c4ay00987h1.pdf]

## Supplementary Data

**Table 1S** Binding parameters for antibody and tracers

**Table 2S** The parameters of FPIA calibration curves for clothianidin

**Fig. 1S** Characterization of the three tracers binding with the MAb.

**Fig. 2S** The MAb dilution curves for the three tracers.

**Fig. 3S** Kinetic binding of tracer and MAb.

**Fig. 4S** Effect of methanol content on the sensitivity of FPIA.

**Table 1S** Binding parameters for antibody and tracers

| Tracers                   | MAb concentration ( $\mu\text{g mL}^{-1}$ )<br>corresponds to 50% binding | Dilution of tracers |
|---------------------------|---------------------------------------------------------------------------|---------------------|
| EDF-labeled clothianidin  | 6.25 (800)                                                                | 400-fold            |
| DBAF-labeled clothianidin | 6.25 (800)                                                                | 250-fold            |
| HMDF-labeled clothianidin | 5.00 (1000)                                                               | 500-fold            |

**Table 2S** The parameters of FPIA calibration curves for clothianidin

| Tracers                   | $\text{IC}_{50}$ ( $\mu\text{g mL}^{-1}$ ) | LOD ( $\text{ng mL}^{-1}$ ) | Linear range( $\text{IC}_{10}$ - $\text{IC}_{90}$ )<br>( $\mu\text{g mL}^{-1}$ ) |
|---------------------------|--------------------------------------------|-----------------------------|----------------------------------------------------------------------------------|
| EDF-labeled clothianidin  | 0.728                                      | 13.6                        | 0.0136-19.47                                                                     |
| DBAF-labeled clothianidin | 0.375                                      | 10.8                        | 0.0108-4.96                                                                      |
| HMDF-labeled clothianidin | 0.0873                                     | 5.53                        | 0.00553-1.04                                                                     |

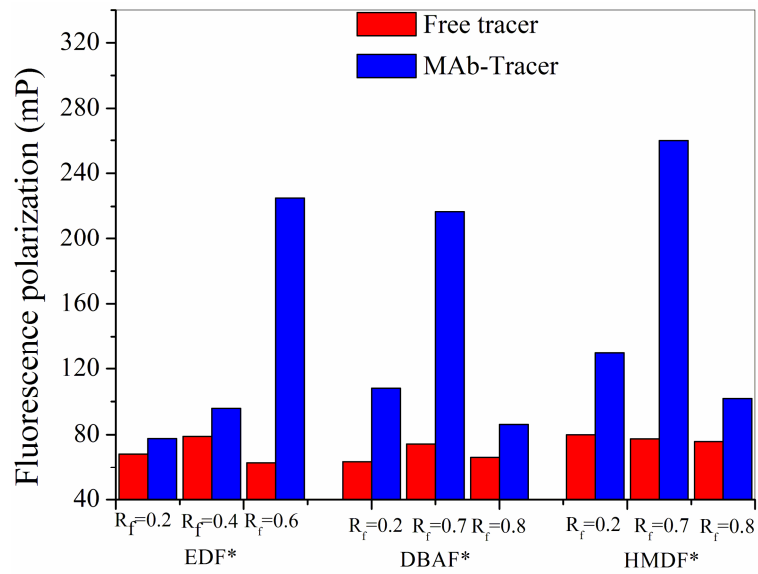

**Fig. 1S** Characterization of the three tracers binding with the MAb. (EDF\*= EDF-labeled clothianidin, DBAF\*= DBAF-labeled clothianidin, HMDF\*= HMDF-labeled clothianidin)

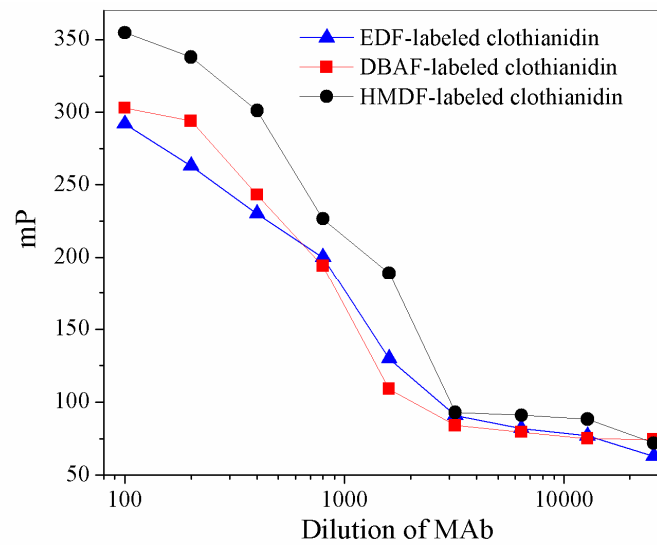

**Fig. 2S** The MAb dilution curves for the three tracers.

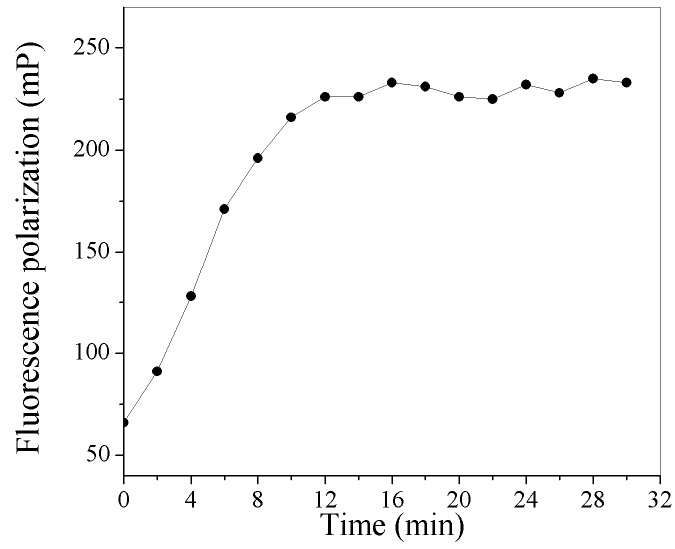

**Fig. 3S** Kinetic binding of tracer and MAb.

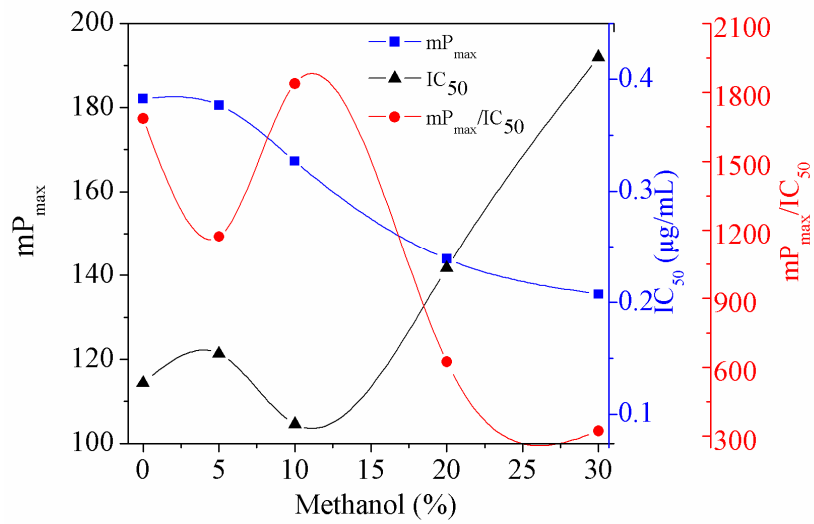

**Fig. 4S** Effect of methanol content on the sensitivity of FPIA.
